# Supplementary material for: Niacin and olive oil promote skewing to the M2 phenotype in bone marrow-derived macrophages of mice with metabolic syndrome
Source: Royal Society of Chemistry journal article supplement (doi:10.1039/c6fo00381h), 2016-01-01
Supplement: c6fo00381h1.pdf [file c6fo00381h1.pdf]

**Supplementa Table 1.** Sequences of RT-qPCR primers for gene expression analysis.

| <b>Target</b>                  | <b>No. <i>GenBank</i></b> | <b>Direction</b> | <b>Sequence (5' --&gt; 3')</b> |
|--------------------------------|---------------------------|------------------|--------------------------------|
| <b>GAPDH</b>                   | NM_001289726              | Forward          | AACTTTGGCATTGTGGAAGG           |
|                                |                           | Reverse          | ACACATTGGGGGTAGGAACA           |
| <b>CCR7</b>                    | NM_001301713              | Forward          | CCAGGCACGCAACTTTGAG            |
|                                |                           | Reverse          | ACTACCACCACGGCAATGATG          |
| <b>iNOs</b>                    | NM_010927                 | Forward          | CACCTTGGAGTTCACCCAGT           |
|                                |                           | Reverse          | ACCACTCGTACTTGGGATGC           |
| <b>MRC1</b>                    | NM_008625.2               | Forward          | ATGCCAAGTGGGAAAATCTG           |
|                                |                           | Reverse          | TGTAGCAGTGGCCTGCATAG           |
| <b>Arg-1</b>                   | NM_007482                 | Forward          | GTGAAGAACCCACGGTCTGT           |
|                                |                           | Reverse          | CTGGTTGTCAGGGGAGTGTT           |
| <b>TNF-<math>\alpha</math></b> | NM_001278601              | Forward          | AGCCCCCAGTCTGTATCCTT           |
|                                |                           | Reverse          | CTCCCTTTGCAGAACTCAGG           |
| <b>IL-1<math>\beta</math></b>  | NM_008361                 | Forward          | GCCATCCTCTGTGACTCAT            |
|                                |                           | Reverse          | AGGCCACAGGTATTTTGTCTG          |
| <b>IL-6</b>                    | NM_031168                 | Forward          | AGTTGCCTTCTTGGGACTGA           |
|                                |                           | Reverse          | TCCACGATTTCCCAGAGAAC           |
| <b>MCP-1</b>                   | NM_011331                 | Forward          | AGGTCCCTGTCATGCTTCTG           |
|                                |                           | Reverse          | TCTGGACCCATTCTTCTTG            |
